# Supplementary material for: Scaling up and dissemination of pre-service education in mental, neurological, and substance use disorders: the way moving forward
Source: publisher site journal article supplement (doi:10.1515/gme-2024-0023), 2025-01-10
Supplement: Supplementary file 1 [file j_gme-2024-0023_suppl_001.docx]

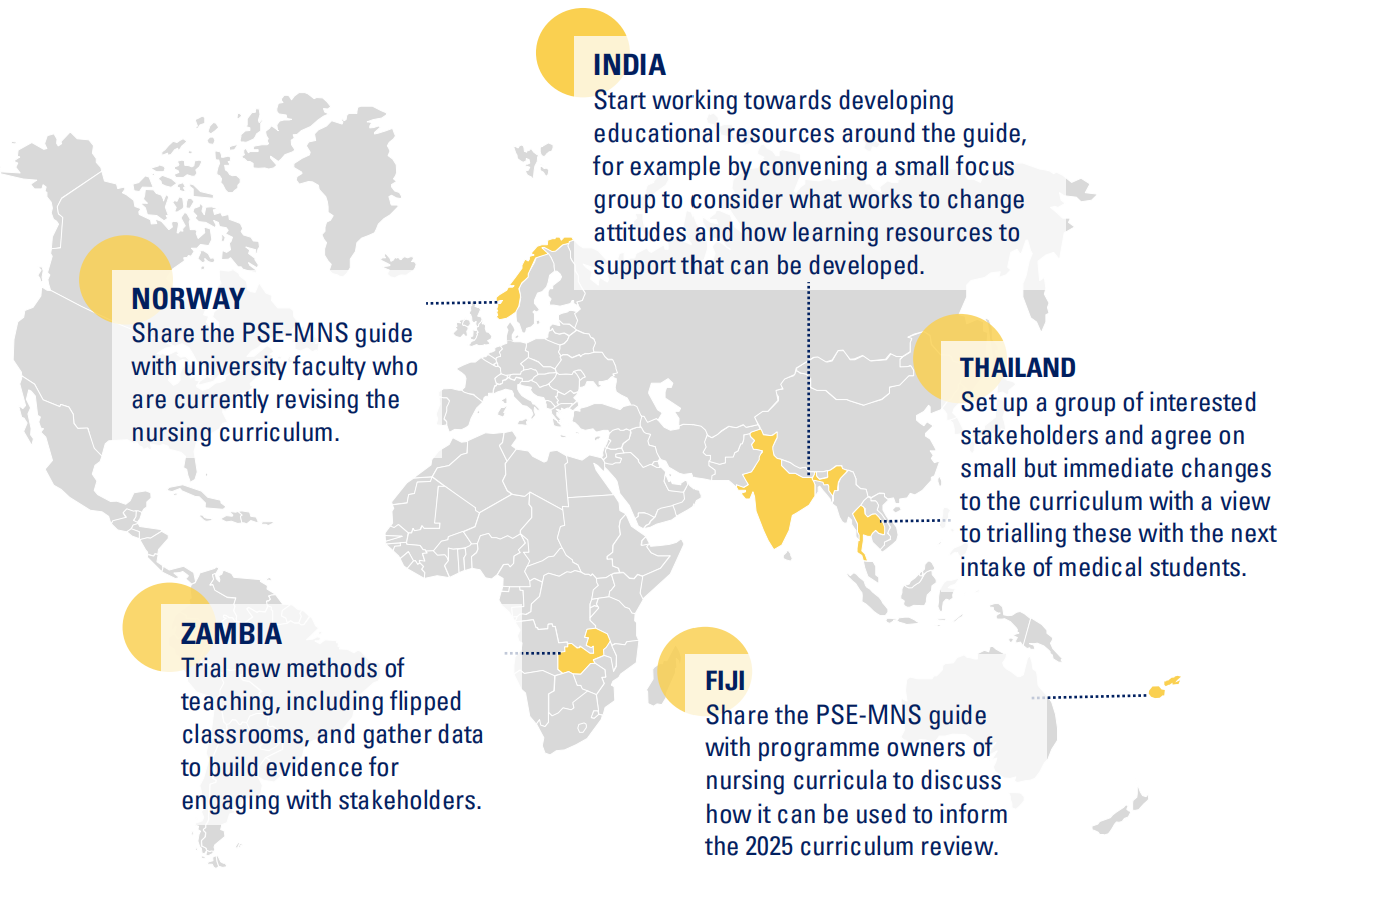


Note: This map was adopted from the “Pre-service education in mental, brain and behavioural health: scaling up implementation and dissemination workshop–WHO Collaborating Centre for Research and Training in Mental Health (Shanghai), 2024”.
